# Supplementary material for: Mapping the footprint of untracked small-scale fisheries using multicriteria spatial analysis and optical satellite imagery
Source: Research Square preprint supplement (doi:10.21203/rs.3.rs-8211723/v1), 2025-12-22
Supplement: Supplementary file 1 [file a10afba24cb3dedc8028cc96.pdf]

## Supplementary material

**TITLE: Mapping the footprint of untracked small-scale fisheries using multicriteria spatial analysis and optical satellite imagery**

***Running title: MCSA and satellite mapping of SSF***

**Authors:** Bommarito C<sup>1</sup>, Marsaglia L<sup>2,3</sup>, Aglieri G<sup>1,4</sup>, Bellù SM<sup>5</sup>, Calò A<sup>6,4</sup>, Cattano C<sup>1,4</sup>, Desiderà E<sup>6,4</sup>, Di Lorenzo M<sup>1,4</sup>, Franzitta G<sup>1</sup>, Giakoumi S<sup>1,4</sup>, Guidetti P<sup>7,4</sup>, Melià P<sup>5</sup>, Milazzo M<sup>5,4</sup>, Papetti C<sup>8</sup>, Quattrocchi F<sup>5,4</sup>, Russo S<sup>1</sup>, Scianna C<sup>9</sup>, Somma E<sup>1,10</sup>, Spatafora D<sup>1,4</sup>, Stranci F<sup>8</sup>, Graziano MG<sup>2</sup>, Milisenda G<sup>1,4</sup>, Di Franco A<sup>1,4</sup>

**Corresponding author: Claudia Bommarito**, Department of Integrative Marine Ecology, Stazione Zoologica Anton Dohrn, Sicily Marine Centre, Lungomare Cristoforo Colombo (complesso Roosevelt), Palermo, Italy, email: [clabommarito@gmail.com](mailto:clabommarito@gmail.com); **Antonio Di Franco**, Department of Integrative Marine Ecology, Stazione Zoologica Anton Dohrn, Sicily Marine Centre, Lungomare Cristoforo Colombo (complesso Roosevelt), Palermo, Italy, email: [antonio.difranco@szn.it](mailto:antonio.difranco@szn.it)

### Affiliations

<sup>1</sup>Department of Integrative Marine Ecology, Stazione Zoologica Anton Dohrn, Sicily Marine Centre, Lungomare Cristoforo Colombo (complesso Roosevelt), Palermo, Italy

<sup>2</sup>Global Fishing Watch, DC 20036, United States

<sup>3</sup>Department of Biology, PhD Program in Evolutionary Biology and Ecology, University of Rome Tor Vergata, Via della Ricerca Scientifica snc, 00133 Rome, Italy

<sup>4</sup>National Biodiversity Future Center (NBFC), 90133 Palermo, Italy

<sup>5</sup>Dipartimento di Elettronica Informazione e Bioingegneria, Politecnico di Milano, Via Ponzio 34/5, 20133, Milano, Italy

<sup>6</sup>Department of Earth and Marine Sciences (DiSTeM), University of Palermo, Via Archirafi 20-22, 90123, Palermo, Italy

<sup>7</sup>Department of Integrative Marine Ecology (EMI), Stazione Zoologica Anton Dohrn, Genoa Marine Center, Piazza del Principe 4, 16126 Genoa, Italy

<sup>8</sup>Department of Biology, University of Padova, Via Ugo Bassi 58B, 35121 Padova, Italy

<sup>9</sup>Department of Integrative Marine Ecology, Stazione Zoologica Anton Dohrn, CRIMAC - Calabria Marine Centre, C.da Torre Spaccata 87071, Amendolara (CS), Italy

<sup>10</sup>Department of Research Infrastructures for marine biological resources, Stazione Zoologica Anton Dohrn, Ischia Marine Centre, 80077, Ischia (Naples), Italy

## **Selected criteria and their ranking**

### *Bathymetry*

To determine bathymetry intervals and their grades, data of fishers' preferences from previous sampling campaigns were used. In particular, the fishers were asked the maximum bathymetry exploited during a fishing trip. The final intervals and grades assigned combined the Jenks Natural Breaks of the above-mentioned sampling data and the intervals used in Kavadas et al. (2015). The spatial bathymetry data used for mapping were retrieved from the General Bathymetric Chart of the Ocean (GEBCO), having a resolution of 0.004°, and the resolution was aligned to 0.02°. The raster of bathymetry was also used to create a polygon ranging from 1 to -600 m, to exclude land areas and deep areas not affected by small-scale fishing, due to legislation. This polygon was then applied to the raster of all the other criteria, to ensure the area considered was equal for all of them.

### *Weather conditions (wind)*

We used wind data as a proxy for weather conditions, as interviewed fishers identified the wind as the most influential meteorological parameter in their decision-making process regarding whether to undertake a fishing operation. Wind data were retrieved from Wind Atlas,

from where only data of 2018 were used, as this was the last year in which the downloadable data covered the entire year. Since fishers defined 10 knots (5 m/s) as the average value beyond which a fishing operation was not undertaken, the intervals and their grades were determined by 1) averaging the daily wind speed, 2) counting the number of days when the wind speed exceeded 10 knots and then 3) processing them by Jenks Natural breaks.

#### *Distance from coast*

The spatial data were retrieved from the Global Fishing Watch dataset of “Distance from shore”, providing, at 1 km resolution, the distance from shore (in kilometers) of every point in the ocean. The grades of distance from the coast’s intervals were assigned according to the grading system applied by Kavadas et al. (2015), after confirmation with experts on the reliability of the grades, considering the Sicilian area.

#### *Distance from port*

To determine distance from port’s intervals and their grades, data from previous sampling campaigns from the authors assessing the maximum distance from port undertaken during a fishing operation through fishers interviews were used, in which the fishers were asked the max. distance (in nautical miles) undertaken during a fishing trip. The final intervals and grades assigned combined the Jenks Natural Breaks of the sampling data.

#### *Competitors – trawlers, purse seines and marine traffic*

The methodology employed to quantify the activity of the main competitors for SSF was consistent for trawlers, purse seines vessels and marine traffic, and it relied on fishing hours (for trawlers and purse seines) and by using the R package “*gfwr*”, fishing hours were retrieved from Global Fishing Watch “Global Datasets of AIS-based Fishing Effort and Vessel Presence”, which calculates the fishing hours of the vessels detected at sea by analysing their AIS data. Fishing vessels are identified via a neural network classifier, vessel registry databases, and manual review by GFW and regional experts. Data is then binned into grid cells of 0.01 or 0.1 degrees and the time (in hours) is calculated by assigning an amount of

time to each AIS detection (which is the time to the previous position) and then summing all positions in each grid cell. For trawlers and purse seines vessels, the fishing hours were first summed for each spatial cell and then averaged from 2020 to 2023. For marine traffic, data from the year 2023 only were used.

### *Spatial restrictions*

We defined the no-take zones as the spatial cells where SSF is prohibited by legislation. In our study, the no-take zones included Marine Protected Areas. The spatial data were retrieved from MAPAMED, EMODNET. Considering that legislation differs among MPA zones (SSF is prohibited in zone A and Bs and partially prohibited in zone B and C) we assigned a value of 0 to the spatial cells belonging to zone A and Bs areas where SSF is permanently prohibited, and of 0.5 to the ones belonging to zone B and C.

**Table S1. Multi-Criteria Spatial Analysis (MCSA) criteria selected and validated by fishers, showing assigned weights, grade intervals (0-4), measurement units, methodological approaches for grade definition, data sources and temporal coverage.**

| CRITERIA                                                        | Weight | Grades'intervals     | Unit   | How grades'intervals were defined                                       | Source of data                                                                  | Grade | Time interval |
|-----------------------------------------------------------------|--------|----------------------|--------|-------------------------------------------------------------------------|---------------------------------------------------------------------------------|-------|---------------|
| Bathymetry max                                                  | 7      | 0-50                 | meters | pre-defined classes by Kavadas et al. 2015; experts' opinion            | General Bathymetric Chart of the Oceans (GEBCO)                                 | 4     | 2023          |
|                                                                 |        | 50 -100              | meters |                                                                         |                                                                                 | 3     | 2023          |
|                                                                 |        | 100 - 200            | meters |                                                                         |                                                                                 | 2     | 2023          |
|                                                                 |        | 200 - 500            | meters |                                                                         |                                                                                 | 1     | 2023          |
|                                                                 |        | >500                 | meters |                                                                         |                                                                                 | 0     | 2023          |
| Wind (days on which wind exceeded 10 knots)                     | 6      | 30-130               | gg     | natural breaks of NEWA data; experts' opinion                           | New European Wind Atlas (NEWA) v1.1                                             | 4     | 2018          |
|                                                                 |        | 130-190              | gg     |                                                                         |                                                                                 | 3     | 2018          |
|                                                                 |        | 190 - 230            | gg     |                                                                         |                                                                                 | 2     | 2018          |
|                                                                 |        | 230 - 270            | gg     |                                                                         |                                                                                 | 1     | 2018          |
|                                                                 |        | > 270                | gg     |                                                                         |                                                                                 | 0     | 2018          |
| Distance from the coast                                         | 5      | < 1.5                | nm     | pre-defined classes by Kavadas et al. 2015; experts' opinion            | Global Fishing Watch. 2021. Distance from Shore, Version 1.0.                   | 4     | 2023          |
|                                                                 |        | 1.5 - 3              | nm     |                                                                         |                                                                                 | 3     | 2023          |
|                                                                 |        | 3 - 6                | nm     |                                                                         |                                                                                 | 2     | 2023          |
|                                                                 |        | > 6                  | nm     |                                                                         |                                                                                 | 1     | 2023          |
| Distance from the port                                          | 4      | 0-5                  | nm     | Jenks Natural breaks of (NAME OF THE PROJECT) data; experts' suggestion | Global Fishing Watch. 2020. Distance from Port, Version 1.0.                    | 4     | 2023          |
|                                                                 |        | 5 - 10               | nm     |                                                                         |                                                                                 | 3     | 2023          |
|                                                                 |        | 10 - 25              | nm     |                                                                         |                                                                                 | 2     | 2023          |
|                                                                 |        | 25 - 40              | nm     |                                                                         |                                                                                 | 1     | 2023          |
|                                                                 |        | >40                  | nm     |                                                                         |                                                                                 | 0     | 2023          |
| Trawlers fleet effort                                           | 4      | absence = < 30       | h      | natural breaks of GFW data; experts' opinion                            | Global Fishing Watch. 2025. Global Apparent Fishing Effort Dataset, Version 3.0 | 4     | 2020-2023     |
|                                                                 |        | low = 30 - 100       | h      |                                                                         |                                                                                 | 3     | 2020-2023     |
|                                                                 |        | medium = 100 - 250   | h      |                                                                         |                                                                                 | 2     | 2020-2023     |
|                                                                 |        | high = 250 - 1000    | h      |                                                                         |                                                                                 | 1     | 2020-2023     |
| Purse seine fleet effort                                        | 3      | absence = < 5        | h      | natural breaks of GFW data; experts' opinion                            | Global Fishing Watch. 2025. Global Apparent Fishing Effort Dataset, Version 3.0 | 4     | 2020-2023     |
|                                                                 |        | low = 5 -20          | h      |                                                                         |                                                                                 | 3     | 2020-2023     |
|                                                                 |        | medium = 20 -100     | h      |                                                                         |                                                                                 | 2     | 2020-2023     |
|                                                                 |        | high = 100 - 240     | h      |                                                                         |                                                                                 | 1     | 2020-2023     |
| Marine traffic activity (excluding fishing boats, boats > 12 m) | 1      | absence = <5.000     | h      | natural breaks of GFW data; experts' opinion                            |                                                                                 | 4     | 2020-2023     |
|                                                                 |        | low= 5.000-20.000    | h      |                                                                         |                                                                                 | 3     | 2020-2023     |
|                                                                 |        | medium=20.000-40.000 | h      |                                                                         |                                                                                 | 2     | 2020-2023     |
|                                                                 |        | high=40.000-270.000  | h      |                                                                         |                                                                                 | 1     | 2020-2023     |

**Table S2. Stakeholder agreement on MCSA criteria weights**

| Criteria                  | Weight | Agreement (%) |
|---------------------------|--------|---------------|
| Depth                     | 7      | 63            |
| Weather - wind conditions | 6      | 60            |
| Distance from coast       | 5      | 52            |

| Criteria                   | Weight | Agreement (%) |
|----------------------------|--------|---------------|
| Distance from port         | 4      | 37            |
| Competitors - trawlers     | 4      | 22            |
| Competitors - purse seines | 3      | 33            |
| Marine traffic             | 1      | 78            |

91 **Table S3. Stakeholder agreement on MCSA criteria grades**

| Criteria                        | Grade Category | Grade Value | Agreement (%) |
|---------------------------------|----------------|-------------|---------------|
| <b>Depth (m)</b>                | 0-50           | 4           | 100           |
|                                 | 50-100         | 3           | 100           |
|                                 | 100-200        | 2           | 100           |
|                                 | 200-500        | 1           | 100           |
| <b>Distance from port (nm)</b>  | 0-5            | 4           | 100           |
|                                 | 5-10           | 3           | 100           |
|                                 | 10-20          | 2           | 67            |
|                                 | 20-40          | 1           | 67            |
| <b>Distance from coast (nm)</b> | 0-1.5          | 4           | 80            |
|                                 | 1.5-3          | 3           | 80            |
|                                 | 3-6            | 2           | 80            |
|                                 | 6-12           | 1           | 75            |

92

93

94
